# Supplementary material for: The right response at the right time: Exploring helminth immune modulation in sticklebacks by experimental coinfection
Source: PubMed Central journal article supplement (PMC6852435; doi:10.1111/mec.15106), 2019-05-17
Supplement: MEC-28-2668-s001.pdf [file MEC-28-2668-s001.pdf]

Supplemental Information for:

## The right response at the right time: Exploring helminth immune modulation in sticklebacks by experimental co-infection

Agnes Piecyk, Marc Ritter, Martin Kalbe

### Table of Contents:

|                                                                                                 |    |
|-------------------------------------------------------------------------------------------------|----|
| SI.1 Information on <i>Diplostomum pseudospathaceum</i> sampling and use .....                  | 2  |
| SI.2 Further information on reverse transcription .....                                         | 2  |
| SI.3 Further information on direct sequencing .....                                             | 2  |
| SI.4 Further information on gene expression analyses .....                                      | 2  |
| SI.5 Gene expression targets, gene references and primer sequences .....                        | 3  |
| SI.6 Pre-amplification of target cDNA for Fluidigm 96.96 Dynamic Array run .....                | 6  |
| SI.7 Fluidigm 96.96 Dynamic Array run using pre-amplified cDNA.....                             | 7  |
| SI.8 Further information on sample sizes and <i>S. solidus</i> infection rates .....            | 7  |
| SI.9 Further information on <i>S. solidus</i> growth and parasite index .....                   | 8  |
| SI.10 Further information on <i>D. pseudospathaceum</i> infection rates .....                   | 9  |
| SI.11 The effect of <i>S. solidus</i> weight on <i>D. pseudospathaceum</i> infection rates..... | 11 |
| SI.12 Further information on host condition and immunological parameters .....                  | 11 |
| SI.13 Detailed results of gene expression analyses .....                                        | 11 |
| References .....                                                                                | 17 |

### SI.1 Information on *Diplostomum pseudospathaceum* sampling and use

*Limnea stagnalis* were sampled by hand or using a small dip net. In the laboratory, each snail was subsequently rinsed with filtered lake water and individually placed in a plastic cup (Bioware 200ml, Huhtamaki) with filtered lake water. After two hours of direct light exposure, snails were screened for trematode infections by inspecting the shed cercariae in the water of the cup. The snails were kept in 16L aquaria at 18°C, with 16 hours of light per day. We used clone mixes from a pool of snail hosts in every infection round in order to overcome strong influences of *D. pseudospathaceum* genotype specificities: following a recovery period of at least two weeks post sampling, *D. pseudospathaceum* positive snails were individually placed in plastic cups with filtered lake water and exposed to direct light for 60 minutes. After verification of infection status and snail viability, 10 snails shedding the largest number of cercariae of the day were transferred to new plastic cups with fresh lake water and exposed to direct light for another 60 minutes. Cercariae from this supernatant were used to create a pool of *D. pseudospathaceum* cercariae of similar age.

### SI.2 Further information on reverse transcription

The reverse transcription protocol was modified by using 0.2 µL Qiagen RNAse inhibitor (instead of 1 µL). The manufacturer ensured that 0.2 µL is sufficient due to differences in effective inhibitor concentrations.

### SI.3 Further information on direct sequencing

PCR conditions were the same in all sequencing attempts. All PCR products were checked on a gel for the right size and amplification specificity. 5 µL aliquot of the completed PCR reaction were mixed thoroughly. 2 µL of Illustra ExoStar 1 Step were added to the reaction mix and incubated at 37°C for 15 minutes. Incubation at 80°C for 15 minutes inactivated the enzymes. Afterwards, the cycle sequencing was prepared as follows:

2 µL PCR/Product /ExoSAP + 2 µL Seqbuffer+1 µL Primer ( forward or reverse of each PCR primer) + 4 µL HPLC H<sup>2</sup>O + 1 µL BDT

Program: BDT 3.1

| Cycle            | Temp | Min   |
|------------------|------|-------|
| Pre-denaturation | 96°C | 01:00 |
| Denaturation     | 96°C | 00:10 |
| Annealing        | 60°C | 04:00 |
|                  | 4°C  | ∞     |

cleaned up with BigDye XTerminator® Purification Kit from Applied Biosystems  
sequenced on 3130 XL Genetic Analyzer from Applied Biosystems

### SI.4 Further information on gene expression analyses

Table S2. Excluded primers

| Gene           | Function                                                            | References                               | comment                                                                    |
|----------------|---------------------------------------------------------------------|------------------------------------------|----------------------------------------------------------------------------|
| <i>tlr2</i>    | Toll-like receptor 2; Germline-encoded pattern-recognition receptor | (Zhu et al., 2013; Brunner et al., 2017) | Amplification efficiency of primer product was not within acceptable range |
| <i>p40phox</i> | Component of NADPH oxidases                                         | (Stutz et al., 2015)                     | Product sequencing revealed amplification of unspecific target             |
| <i>vegfa1</i>  | Stimulates macrophage and monocyte migration                        | (Brunner et al., 2017)                   | Unspecific primer products, ambiguous PCR products                         |
| <i>ly75</i>    | Reduces B-lymphocyte proliferation                                  | (Brunner et al., 2017)                   | Unspecific primer products, ambiguous PCR products                         |
| <i>cmip</i>    | Signaling protein in Th2 pathway                                    | (Robertson et al., 2015)                 | Unspecific primer products, ambiguous PCR products                         |

## SI.5 Gene expression targets, gene references and primer sequences

| Gene                          | Function                                                                                                                                       | References                                                               | ENSEMBL ID         | Forward primer           | Reverse primer           |
|-------------------------------|------------------------------------------------------------------------------------------------------------------------------------------------|--------------------------------------------------------------------------|--------------------|--------------------------|--------------------------|
| <b>Reference genes</b>        |                                                                                                                                                |                                                                          |                    |                          |                          |
| <i>b2m</i>                    | Beta-2-microglobulin                                                                                                                           | (Hibbeler et al., 2008)                                                  | ENSGACT00000025544 | GAAGATGTGTTGAATAGAAGCTGG | GAAGATGTGTTGAATAGAAGCTGG |
| <i>ef1a</i>                   | Elongation factor 1 $\alpha$                                                                                                                   | (Hibbeler et al., 2008)                                                  | ENSGACT00000002893 | CCACCGTTGCCTTTGTCC       | TGGGACTGTTCCAATACCTCC    |
| <i>rpl13a</i>                 | L13A ribosomal binding protein                                                                                                                 | (Hibbeler et al., 2008)                                                  | ENSGACT00000012319 | CACCTTGGTCAACTTGAACAGTG  | TCCCTCCGCCCTACGAC        |
| <i>ubc</i>                    | Ubiquitin                                                                                                                                      | (Hibbeler et al., 2008)                                                  | ENSGACT00000010662 | AGACGGGCATAGCACTTGC      | CAGGACAAGGAAGGCATCC      |
| <b>Innate</b>                 |                                                                                                                                                |                                                                          |                    |                          |                          |
| <i>cd97</i>                   | Promotor of granulocyte and neutrophil migration, required for activation of the innate immune response                                        | (Leemans et al., 2004; Rhodes et al., 2009)                              | ENSGACT00000024871 | CTCGTGGCACTCTACGACATGAAG | CAGCCCTATCTTGGTGACCAGTTG |
| <i>csf3r</i>                  | Granulocyte colony-stimulating factor 3 receptor; role in differentiation and proliferation of granulocytes                                    | (Tabbara, 1993; Birrer et al., 2012; Maxson et al., 2013; Brunner, 2016) | ENSGACT00000018254 | TCGGGATTGTCCTCTTCTCAG    | TGGGTCAAACCTGGCTGCAC     |
| <i>il-1<math>\beta</math></i> | Interleukin 1 $\beta$ ; cytokine with function in early response proinflammatory signaling                                                     | (Zhu et al., 2013; Brunner et al., 2017)                                 | ENSGACT00000019325 | TGACGATGAAGCAGGTGGTCAAC  | ACAGCGTCACGATCTCCTCTTC   |
| <i>marco, RON</i>             | Macrophage receptor with collagenous structure; mediates macrophage recognition and clearance of pathogens                                     | (Kraal et al., 2000; Kissick et al., 2014)                               | ENSGACT00000001965 | CCCTTCGACCTTCACTGCC      | TGTTTACCCCAACCCCTCCA     |
| <i>mif1</i>                   | Macrophage migration inhibitory factor; stops random macrophage migration through tissue, proinflammatory mediator of the innate immune system | (Calandra & Roger, 2003; Brunner et al., 2017)                           | ENSGACT00000023656 | ATCAGCGGAGCTCACACAAGC    | TCAGGAGAGATGCTCAGGTGTTTG |
| <i>mst1ra</i>                 | Macrophage stimulating 1 receptor a; plays an important role in macrophage regulation                                                          | (Wang et al., 2002; Huang et al., 2016)                                  | ENSGACT00000013997 | ATGCCATCGAAAGCTTGCA      | TGATGTCGTACGGGTCCACA     |

|                                                                           |                                                                                                                                                               |                                                                      |                    |                          |                          |
|---------------------------------------------------------------------------|---------------------------------------------------------------------------------------------------------------------------------------------------------------|----------------------------------------------------------------------|--------------------|--------------------------|--------------------------|
| <b><i>nkef-β</i>,<br/><i>peroxi-<br/>redoxin 1</i><br/><i>p22phox</i></b> | Natural killer cell enhancing factor; enhances cytotoxicity of NK cells, also protects against oxidative damage                                               | (Shau et al., 1993; Stutz et al., 2015)                              | ENSGACT00000021380 | ACTTCTCCC ACTTTGCATGG    | CAATGCCTTCATCCTCCTTC     |
|                                                                           | NADPH oxidase component p22phox; part of the reactive oxygen species production machinery                                                                     | (Bedard & Krause, 2007; Mayumi et al., 2008)                         | ENSGACT00000021084 | GCCTCGGGACTCATTCTCCT     | TGGCCCTCTTGCTTCTTGA      |
| <b><i>saal1</i></b>                                                       | Serum amyloid A; acute phase protein during inflammation response, mediates release of TNF-α and IL-1β                                                        | (Haarder et al., 2013; Kovacevic et al., 2015; Brunner et al., 2017) | ENSGACT00000007599 | TCGCAGTGAGGCCAAAGATGAG   | AAATCTGCCACCGTGCCTTGG    |
| <b><i>sla1</i></b>                                                        | Src-like-adaptor; necessary for maturation and activation of monocytic and dendritic cells, functions in T-cell signaling and B-cell development and function | (Marton et al., 2015; Brunner et al., 2017)                          | ENSGACT00000007895 | ACAGAGTCGGCTCCTTCATGATAC | TCACAGAGAGCGAATACAGACCTC |
| <b><i>tnfr1</i></b>                                                       | Tumor necrosis factor receptor 1; functions in regulation of inflammation, mediates cellular apoptosis and differentiation                                    | (Zhu et al., 2013; Brunner et al., 2017)                             | ENSGACT00000013502 | AACTACTACAGAGCCAAGGGCAAG | ACGGCACTCAGCGGTACAATTC   |
| <b>Adaptive</b>                                                           |                                                                                                                                                               |                                                                      |                    |                          |                          |
| <b><i>cd83</i></b>                                                        | Marker for mature dendritic cells, expressed on activated B and T cells, costimulatory to activate naïve and memory T-cells                                   | (Aerts-Toegaert et al., 2007; Stutz et al., 2015)                    | ENSGACT00000000428 | AGGACCCAGCGTATAAATGG     | CCCTGGTGATTTTCCTCATC     |
| <b><i>foxp3</i>;<br/><i>forkhead<br/>box N2b</i></b>                      | Transcription factor; regulates functions important for the establishment of the T-reg lineage, key mediator of T-cell activation                             | (Rao & Naqvi, 2011; Robertson et al., 2015; Kasheta et al., 2017)    | ENSGACT00000007261 | GTTGACCCATGCAATTCCGA     | CTGCTGTAGTTGTGGTCTTG     |
| <b><i>igm</i></b>                                                         | Immunoglobulin heavy constant mu (IgM); antibody molecule, part of the humoral immune response                                                                | (S. Hibbeler, unpublished; Rønneseth et al., 2015; Zhu et al., 2013) | ENSGACT00000016907 | AAGGCAGGAGAATGAAACCTTGG  | CCGAGTGAGCAGACAGGGACTGG  |
| <b><i>il-16</i></b>                                                       | Interleukin 16; cytokine with function in T-cell migration and expansion, chemoattractant for monocytes and eosinophils                                       | (Wen et al., 2006; Zhu et al., 2013; Brunner et al., 2017)           | ENSGACT00000016499 | CTGGTCTGGGCTTCAGTATTGC   | CTGGGAAACACTCTGTGGACTG   |

|                     |                                                                                                                                               |                                                                      |                    |                           |                          |
|---------------------|-----------------------------------------------------------------------------------------------------------------------------------------------|----------------------------------------------------------------------|--------------------|---------------------------|--------------------------|
| <b><i>mhcll</i></b> | Major histocompatibility complex class IIb exon 2; pathogen recognizing protein of the adaptive immune response,                              | (Lenz et al., 2009)                                                  | ENSGACT00000000425 | GTCTTTAACTCCACGGAGCTGAAGG | ACTCACCGGACTTAGTCAG      |
| <b><i>stat4</i></b> | Signal transducer and activator of transcription 4; required for TH1-cell differentiation, opposes TH2 and TH17 like responses                | (Kaplan, 2005; Premachandra et al., 2013; Wang & Secombes, 2013)     | ENSGACT00000003538 | CTCTCAGTTTCGAGGCTTGCTT    | GGCAGTTGGCTCACATTGG      |
| <b><i>stat6</i></b> | Signal transducer and activator of transcription 6; required for TH2-cell differentiation, regulates expression of TH2 relevant cytokine IL-4 | (Wang & Secombes, 2013; Robertson et al., 2015)                      | ENSGACT00000011232 | CTCAGCCACAGTTCCAACCGTTC   | GTCGGATGTTCTGGACCTCGAGT  |
| <b><i>tcr-β</i></b> | T-cell receptor β-chain; function in binding of MHC-peptide ligands to initiate adaptive immune response                                      | (Yanagi et al., 1984; Smith-Garvin et al., 2009; Stutz et al., 2015) | ENSGACT00000016457 | GAGGGCAAAAACCTTCACCTG     | TAGGAGAATCTGGCCGTTTG     |
| <b><i>tgf-β</i></b> | Transforming growth factor β; cytokine with functions in cell growth, migration, differentiation and proliferation of T and B-cells           | (Zhu et al., 2013; Robertson et al., 2015)                           | ENSGACT00000016968 | TCCCGCTTCGTCACCAACCA      | ACGTCTGTCTGGCCACATTAC    |
| <b>Complement</b>   |                                                                                                                                               |                                                                      |                    |                           |                          |
| <b><i>c7</i></b>    | Complement component 7; initializing function in the membrane attack complex of the complement system                                         | (Zhu et al., 2013; Haase et al., 2014; Brunner et al., 2017)         | ENSGACT00000009181 | TGGCTCAAGCTCAGCACAACAG    | AGCGACACGTGTTTGTGTTGATCG |
| <b><i>c9</i></b>    | Complement component 9; structural part of the membrane attack complex of the complement system,                                              | (Zhu et al., 2013; Haase et al., 2014; Brunner et al., 2017)         | ENSGACT00000020968 | CCGTGACGAACAAAGACTCAGTTG  | TCTGACCGATGTCAGCACCTTG   |
| <b><i>cfb</i></b>   | Complement factor B; activating complement component of the alternative pathway                                                               | (Zhu et al., 2013; Haase et al., 2014; Brunner, 2016)                | ENSGACT00000027346 | GAGCGTCGCACAATACAGGTTG    | TACCACCGGAAGCGCACAAATC   |

**Table S3. Primer efficiencies**

| Primer ID      | Efficiency | E (SE) | R <sup>2</sup> |
|----------------|------------|--------|----------------|
| <i>cfb</i>     | 1.909      | 0.093  | 0.803          |
| <i>c7</i>      | 2.089      | 0.015  | 0.995          |
| <i>c9</i>      | 1.948      | 0.126  | 0.742          |
| <i>cd83</i>    | 2.047      | 0.033  | 0.978          |
| <i>csf3r</i>   | 2.024      | 0.085  | 0.885          |
| <i>foxp3</i>   | 2.065      | 0.028  | 0.986          |
| <i>cd97</i>    | 2.029      | 0.05   | 0.957          |
| <i>igm</i>     | 2.087      | 0.017  | 0.994          |
| <i>mhcII</i>   | 2.011      | 0.024  | 0.988          |
| <i>mif1</i>    | 2.064      | 0.015  | 0.995          |
| <i>nkef-β</i>  | 2.144      | 0.016  | 0.996          |
| <i>sla1</i>    | 2.161      | 0.017  | 0.996          |
| <i>stat4</i>   | 2.243      | 0.028  | 0.99           |
| <i>stat6</i>   | 2.062      | 0.024  | 0.989          |
| <i>tcr-β</i>   | 2.02       | 0.014  | 0.996          |
| <i>tgf-β</i>   | 2.079      | 0.02   | 0.994          |
| <i>tnfr1</i>   | 2.19       | 0.025  | 0.99           |
| <i>il-16</i>   | 2.163      | 0.018  | 0.994          |
| <i>il-1β</i>   | 2.016      | 0.101  | 0.852          |
| <i>marco</i>   | 2.092      | 0.02   | 0.993          |
| <i>mst1ra</i>  | 2.228      | 0.042  | 0.976          |
| <i>p22phox</i> | 2.006      | 0.012  | 0.996          |
| <i>rpl13a</i>  | 2.048      | 0.022  | 0.992          |
| <i>saal1</i>   | 2.025      | 0.034  | 0.974          |
| <i>ubc</i>     | 2.116      | 0.014  | 0.996          |

**SI.6 Pre-amplification of target cDNA for Fluidigm 96.96 Dynamic Array run**

- Primer Mix: total 200 μL
- 1 μL of each 100μM primer (fwd and rev) or 2 μL of paired primer mix
- plus 136 μL DNA suspension buffer (10 mM Tris, pH 8.0, 0,1 mM EDTA)

Pre Mix - Prepared in a 1.5 ml tube: total 396 μL (includes overage)

- 264 μL 2X TaqMan PreAmp Master Mix (Applied Biosystems, PN 4391128)
- 52.8 μL Primer Mix
- 79.2 μL H<sub>2</sub>O

We pipetted 3.7 μL Pre-Mix in each well of a 96 well plate and added 1.3 μL of cDNA. Negative controls (NTCs) were included by using 1.3 μL of ddH<sub>2</sub>O instead of cDNA. The PCR protocol was the following:

| Temp  | Time   | No. cycles |
|-------|--------|------------|
| 95 °C | 10 min | 14         |
| 95 °C | 15 sec |            |
| 60 °C | 4 min  |            |
| 4 °C  | ∞      |            |

### SI.7 Fluidigm 96.96 Dynamic Array run using pre-amplified cDNA

Pre Mix – prepared in a 1.5 ml tube: total 406.6 µL (for 96 samples, includes overage)

- 369.6 µL SsoFast EvaGreen Supermix with Low ROX (BioRad, PN 172-5211)
- 37 µL 20X DNA Binding Dye Sample Loading Reagent (Fluidigm, PN 100-3738)

The following was pipetted into each well of a 96 well plate

- 3.9 µL Sample Pre Mix
- 3.1 µL sample (preamplified)
- vortexed 20s, spun down 30s

Assay Pre-mix – prepared in a 1.5 ml tube: total 665.3 µL (for 96 reactions, includes overage)

- 369.6 µL 2X Assay loading Reagent (Fluidigm, PN 85000736)
- 295.7 µL low TE buffer

The following was pipetted into each well of a 96 well plate (7 µL per well)

- 6.3 µL Assay Pre-mix
- 0.35 µL from each of the 100µM primers (fwd and rev ) or 0.7 µL from the mix

After priming of the chip, Sample Pre Mix and Assay pre Mix were loaded according to the manufacturer's instructions and the chip was run under cycler protocol: "GE Fast 96x96 PCR+Melt v2".

| Temp       | Time     | No. Cycles |
|------------|----------|------------|
| 70 °C      | 40 min   |            |
| 60 °C      | 30 sec   |            |
| 95 °C      | 1 min    |            |
| 96 °C      | 5 sec    | 30         |
| 60 °C      | 20 sec   |            |
| 60 - 95 °C | + 1°C/3s |            |

### SI.8 Further information on sample sizes and *S. solidus* infection rates

**Table S4. Sample sizes**

| Treatment group                                                        | week 3 | week 6 | week 9 |
|------------------------------------------------------------------------|--------|--------|--------|
| Sham-exposed HR control                                                | 6      | 6      | 6      |
| Sham-exposed LR control                                                | 6      | 6      | 4      |
| HR hosts infected with LG <i>S. solidus</i> (single and co-infections) | 8      | 12     | 9      |
| HR hosts exposed to LG <i>S. solidus</i> (uninfected)                  | 28     | 24     | 22     |
| LR hosts infected with LG <i>S. solidus</i> (single and co-infections) | 16     | 13     | 11     |
| LR hosts exposed to LG <i>S. solidus</i> (uninfected)                  | 20     | 23     | 24     |
| HR hosts infected with HG <i>S. solidus</i> (single and co-infections) | 16     | 10     | 12     |
| HR hosts exposed to HG <i>S. solidus</i> (uninfected)                  | 20     | 26     | 19     |
| LR hosts infected with HG <i>S. solidus</i> (single and co-infections) | 9      | 9      | 15     |
| LR hosts exposed to HG <i>S. solidus</i> (uninfected)                  | 27     | 27     | 19     |
| HR hosts infected with <i>D. pseudospathaceum</i>                      | 6      | 6      | 6      |
| LR hosts infected with <i>D. pseudospathaceum</i>                      | 6      | 6      | 6      |
| Fish that died before dissection                                       |        | 12     |        |
| Total                                                                  |        | 501    |        |

We tested effects on *S. solidus* infection rates by using a GLMM with the origin of the host and the origin of the parasite as well as their interaction as fixed effects and fish family as random term. The model did not differ significantly from the Nullmodel (likelihood ratio test:  $X^2_3 = 4.2365$ ,  $p = 0.237$ ).

### SI.9 Further information on *S. solidus* growth and parasite index

*S. solidus* growth differed significantly between the two parasite populations. HG parasites grew faster and larger than LG parasites (Type III Wald chisquare tests: H:P:T three-way interaction:  $X^2_4 = 24.8413$ ,  $p < 0.0001$ ).

**Table S5. Differences in *S. solidus* parasite indices according to host types**

| Contrast |            | Estimate | Std. Error | z value | Pr(> z ) |
|----------|------------|----------|------------|---------|----------|
| T        | P:H        |          |            |         |          |
| 3        | LG:HR - LR | -0.04425 | 0.06905    | -0.641  | 0.98779  |
| 3        | HG:HR - LR | 0.03158  | 0.06729    | 0.469   | 0.99773  |
| 6        | LG:HR - LR | -2.52061 | 0.77996    | -3.232  | 0.00736  |
| 6        | HG:HR - LR | -2.74607 | 0.89502    | -3.068  | 0.01284  |
| 9        | LG:HR - LR | -7.48326 | 1.34521    | -5.563  | < 1e-05  |
| 9        | HG:HR - LR | -6.00136 | 1.15927    | -5.177  | < 1e-05  |

**Table S6. Differences in *S. solidus* parasite indices according to *S. solidus* types**

| Contrast |            | Estimate | Std. Error | z value | Pr(> z ) |
|----------|------------|----------|------------|---------|----------|
| T        | P:H        |          |            |         |          |
| 3        | HG - LG:LR | 0.27701  | 0.05873    | 4.717   | 1.44E-05 |
| 3        | HG - LG:HR | 0.35284  | 0.06169    | 5.72    | 6.40E-08 |
| 6        | HG - LG:LR | 8.96403  | 0.8441     | 10.62   | < 1e-10  |
| 6        | HG - LG:HR | 8.73858  | 0.83369    | 10.482  | < 1e-10  |
| 9        | HG - LG:LR | 13.17036 | 1.18776    | 11.088  | < 1e-10  |
| 9        | HG - LG:HR | 14.65227 | 1.31937    | 11.105  | < 1e-10  |

**Table S7. Differences in parasite indices over time**

| Contrast |       | Estimate | Std. Error | z value | Pr(> z ) |
|----------|-------|----------|------------|---------|----------|
| T        | P:H   |          |            |         |          |
| 6 - 3    | LG:LR | 3.4222   | 0.541      | 6.325   | < 1e-04  |
| 6 - 3    | LG:HR | 0.9459   | 0.5643     | 1.676   | 0.593759 |
| 6 - 3    | HG:LR | 12.1092  | 0.6505     | 18.614  | < 1e-04  |
| 6 - 3    | HG:HR | 9.3316   | 0.6168     | 15.129  | < 1e-04  |
| 9 - 3    | LG:LR | 11.3698  | 0.9028     | 12.594  | < 1e-04  |
| 9 - 3    | LG:HR | 3.9308   | 0.9986     | 3.936   | 0.000904 |
| 9 - 3    | HG:LR | 24.2632  | 0.7739     | 31.35   | < 1e-04  |
| 9 - 3    | HG:HR | 18.2303  | 0.8645     | 21.087  | < 1e-04  |
| 9 - 6    | LG:LR | 7.9476   | 1.0514     | 7.559   | < 1e-04  |
| 9 - 6    | LG:HR | 2.985    | 1.1448     | 2.607   | 0.087956 |
| 9 - 6    | HG:LR | 12.1539  | 1.0089     | 12.047  | < 1e-04  |
| 9 - 6    | HG:HR | 8.8987   | 1.0606     | 8.39    | < 1e-04  |



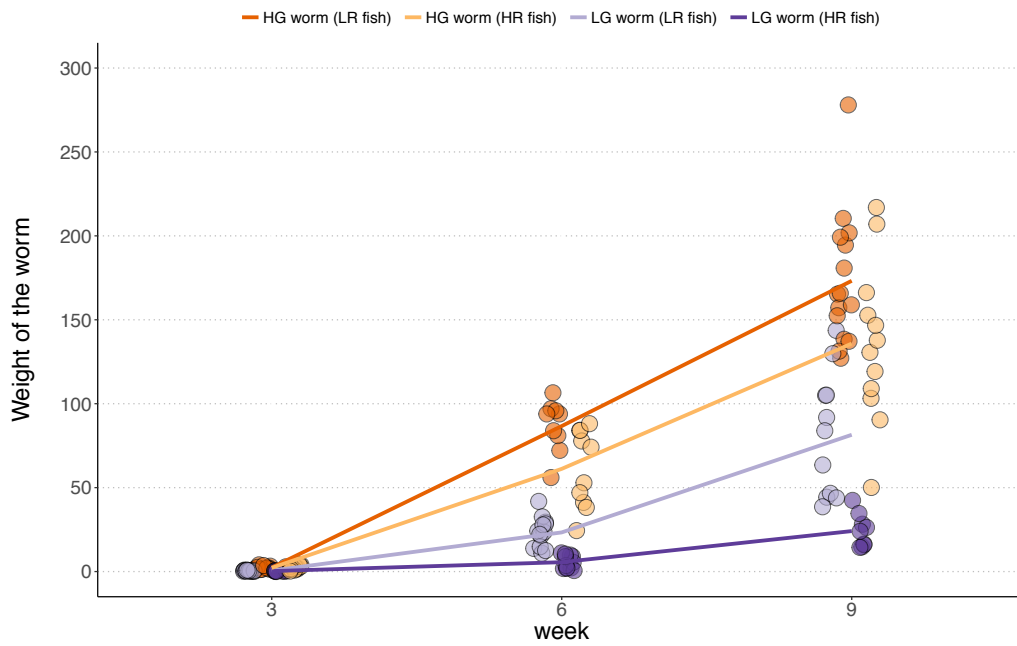

**Fig. S1. *Schistocephalus solidus* growth over time.** Plerocercoids were weighed 3, 6, or 9 weeks after infection. Each dot represents one *S. solidus* individual; color coding follows Fig. 1. Weights were measured in mg. HG: high growth *S. solidus*; LR: low resistance stickleback; LG: low growth *S. solidus*; HR: high resistance stickleback.

### SI.10 Further information on *D. pseudospathaceum* infection rates

**Table S8. *D. pseudospathaceum* infection rate differences between host types**

| Contrast |              | Estimate | Std. Error | z value | Pr(> z ) |
|----------|--------------|----------|------------|---------|----------|
| T        | P:H          |          |            |         |          |
| 3        | CTRL:HR - LR | -0.5708  | 0.516      | -1.106  | 0.5222   |
| 3        | LG:HR - LR   | 0.4501   | 0.52       | 0.866   | 0.696    |
| 3        | HG:HR - LR   | -0.124   | 0.5099     | -0.243  | 0.9994   |
| 6        | CTRL:HR - LR | 1.2871   | 0.5485     | 2.347   | 0.0541   |
| 6        | LG:HR - LR   | 0.6251   | 0.5226     | 1.196   | 0.4638   |
| 6        | HG:HR - LR   | 0.422    | 0.5131     | 0.822   | 0.7289   |
| 9        | CTRL:HR - LR | 0.2924   | 0.5298     | 0.552   | 0.9212   |
| 9        | LG:HR - LR   | 0.1643   | 0.5221     | 0.315   | 0.9962   |
| 9        | HG:HR - LR   | -0.1888  | 0.5022     | -0.376  | 0.9883   |

**Table S9. *D. pseudospathaceum* infection rate differences over time**

| Contrast |         | Estimate | Std. Error | z value | Pr(> z ) |
|----------|---------|----------|------------|---------|----------|
| T        | P:H     |          |            |         |          |
| 6 - 3    | CTRL:LR | -2.03113 | 0.23082    | -8.799  | < 1e-05  |
| 6 - 3    | CTRL:HR | -0.17322 | 0.17765    | -0.975  | 0.99532  |
| 6 - 3    | LG:LR   | -0.24223 | 0.1645     | -1.473  | 0.88485  |
| 6 - 3    | LG:HR   | -0.06721 | 0.19189    | -0.35   | 1        |
| 6 - 3    | HG:LR   | -0.29627 | 0.14855    | -1.994  | 0.512    |
| 6 - 3    | HG:HR   | 0.24966  | 0.13211    | 1.89    | 0.59702  |
| 9 - 3    | CTRL:LR | -1.15953 | 0.17763    | -6.528  | < 1e-05  |
| 9 - 3    | CTRL:HR | -0.2964  | 0.18226    | -1.626  | 0.79653  |
| 9 - 3    | LG:LR   | -0.09894 | 0.16859    | -0.587  | 0.99997  |
| 9 - 3    | LG:HR   | -0.38468 | 0.17346    | -2.218  | 0.34321  |
| 9 - 3    | HG:LR   | 0.78552  | 0.12199    | 6.439   | < 1e-05  |
| 9 - 3    | HG:HR   | 0.72067  | 0.12039    | 5.986   | < 1e-05  |
| 9 - 6    | CTRL:LR | 0.8716   | 0.25233    | 3.454   | 0.00949  |
| 9 - 6    | CTRL:HR | -0.12318 | 0.18768    | -0.656  | 0.99991  |
| 9 - 6    | LG:LR   | 0.14329  | 0.16962    | 0.845   | 0.99879  |
| 9 - 6    | LG:HR   | -0.31746 | 0.18746    | -1.694  | 0.74999  |
| 9 - 6    | HG:LR   | 1.08179  | 0.12868    | 8.407   | < 1e-05  |
| 9 - 6    | HG:HR   | 0.47101  | 0.12281    | 3.835   | 0.0022   |

**Table S10. *D. pseudospathaceum* infection rate differences between *S. solidus* types**

| Contrast |              | Estimate | Std. Error | z value | Pr(> z ) |
|----------|--------------|----------|------------|---------|----------|
| T        | P:H          |          |            |         |          |
| 3        | LG - CTRL:LR | -0.98089 | 0.15285    | -6.417  | < 1e-05  |
| 3        | LG - CTRL:HR | 0.03994  | 0.17581    | 0.227   | 1        |
| 3        | HG - CTRL:LR | -0.29524 | 0.14467    | -2.041  | 0.472444 |
| 3        | HG - CTRL:HR | 0.15155  | 0.15047    | 1.007   | 0.993599 |
| 3        | HG - LG:LR   | 0.68564  | 0.15291    | 4.484   | 0.000134 |
| 3        | HG - LG:HR   | 0.11161  | 0.15733    | 0.709   | 0.999787 |
| 6        | LG - CTRL:LR | 0.80801  | 0.23732    | 3.405   | 0.011265 |
| 6        | LG - CTRL:HR | 0.14595  | 0.18638    | 0.783   | 0.999416 |
| 6        | HG - CTRL:LR | 1.43961  | 0.23358    | 6.163   | < 1e-05  |
| 6        | HG - CTRL:HR | 0.57443  | 0.16127    | 3.562   | 0.006328 |
| 6        | HG - LG:LR   | 0.63161  | 0.1596     | 3.957   | 0.001328 |
| 6        | HG - LG:HR   | 0.42848  | 0.17063    | 2.511   | 0.175896 |
| 9        | LG - CTRL:LR | 0.0797   | 0.19027    | 0.419   | 0.999999 |
| 9        | LG - CTRL:HR | -0.04833 | 0.18436    | -0.262  | 1        |
| 9        | HG - CTRL:LR | 1.64981  | 0.15982    | 10.323  | < 1e-05  |
| 9        | HG - CTRL:HR | 1.16862  | 0.15769    | 7.411   | < 1e-05  |
| 9        | HG - LG:LR   | 1.57011  | 0.14074    | 11.156  | < 1e-05  |
| 9        | HG - LG:HR   | 1.21696  | 0.14675    | 8.293   | < 1e-05  |

### SI.11 The effect of *S. solidus* weight on *D. pseudospathaceum* infection rates

Using *S. solidus* weight as a covariate in the statistical model did not improve the model fit in week 3, but did so at later time points, namely for data from LR fish in week 6 (likelihood ratio test:  $X^2_2 = 10.01$ ,  $p = 0.0067$ ) and data from both fish origins in week 9 (likelihood ratio test:  $X^2_2 = 13.37$ ,  $p = 0.0013$ ). The model fit for HR data of week 6 was not improved (likelihood ratio test:  $X^2_2 = 4.82$ ,  $p = 0.0897$ ). Due to very large eigenvalues, we z-transformed the weight of the worm in week 6 and week 9.

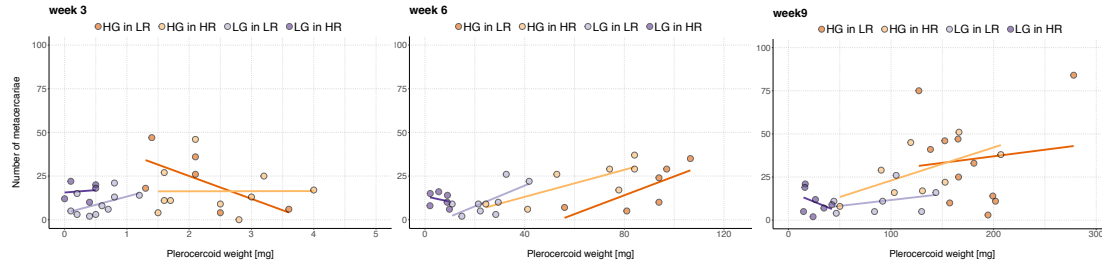

**Figure S2.** The relationship between *S. solidus* weight and *D. pseudospathaceum* infection rates. *S. solidus* infected sticklebacks were exposed to 100 *D. pseudospathaceum* cercariae at three different time points. Each dot represents one *S. solidus* individual; lines represent linear model fits; color coding follows Fig. 1.

### SI.12 Further information on host condition and immunological parameters

The condition factor (CF) differed significantly between host populations ( $F_{1,4} = 25.027$ ,  $p = 0.0075$ ) and according to an interaction between time point and treatment ( $F_{10,170} = 2.543$ ,  $p = 0.007$ ). FDR-corrected post hoc comparisons confirmed significantly higher condition of HR than LR hosts at all time points (LMMs; each  $p < 0.0001$ ). Treatment had no significant influence; the CF increased between week 3 and week 9 in *D. pseudospathaceum* infected HR fish. The hepatosomatic index (HSI) was significantly affected by an interaction between treatment and time point ( $F_{10,170} = 4.102$ ,  $p < 0.0001$ ). LR controls had higher HSIs than HR controls in week 9; the HSI increased between week 3 and 9 in LR controls (LMMs; each  $p < 0.001$ ). In week 9, LG infection was associated with a smaller HSI than in controls in LR fish; infection with *D. pseudospathaceum* correlated with significantly higher HSI in comparison to co-infection with HG *S. solidus* in LR sticklebacks (LMMs; each  $p < 0.001$ ). Splenosomatic indices (SSI) and head kidney indices (HKI) were not affected by experimental factors.

### SI.13 Detailed results of gene expression analyses

**Table S11.** Sample sizes for gene expression analyses

| Treatment group                                                             | week 3 | week 6 | week 9 |
|-----------------------------------------------------------------------------|--------|--------|--------|
| Sham-exposed HR control                                                     | 6      | 6      | 6      |
| Sham-exposed LR control                                                     | 4      | 6      | 4      |
| HR hosts infected with LG <i>S. solidus</i>                                 | 3      | 6      | 2      |
| LR hosts infected with LG <i>S. solidus</i>                                 | 6      | 5      | 4      |
| HR hosts infected with HG <i>S. solidus</i>                                 | 5      | 3      | 4      |
| LR hosts infected with HG <i>S. solidus</i>                                 | 3      | 3      | 4      |
| HR hosts infected with <i>D. pseudospathaceum</i>                           | 5      | 5      | 6      |
| LR hosts infected with <i>D. pseudospathaceum</i>                           | 5      | 6      | 5      |
| HR hosts co-infected with LG <i>S. solidus</i> & <i>D. pseudospathaceum</i> | 4      | 6      | 7      |
| LR hosts co-infected with LG <i>S. solidus</i> & <i>D. pseudospathaceum</i> | 10     | 8      | 7      |
| HR hosts co-infected with HG <i>S. solidus</i> & <i>D. pseudospathaceum</i> | 10     | 7      | 8      |
| LR hosts co-infected with HG <i>S. solidus</i> & <i>D. pseudospathaceum</i> | 6      | 6      | 11     |
| Total                                                                       |        | 202    |        |

**Table S12. Multivariate statistics (PERMANOVA results) of *S. solidus* infection effect on stickleback immune gene expression**

| contrast |                            |                               |    |           |         |               |         |
|----------|----------------------------|-------------------------------|----|-----------|---------|---------------|---------|
| T        | P:H                        |                               | Df | SumsOfSqs | F.Model | Pr(<F)        | R2      |
| 3        | LG - CTRL:HR&LR            | all genes                     | 1  | 2.720     | 1.27410 | 0.3787        | 0.06220 |
| 3        | HG - CTRL:HR&LR            | all genes                     | 1  | 1.813     | 0.6536  | 0.5375        | 0.03490 |
| 3        | HG - LG:HR&LR              | all genes                     | 1  | 1.180     | 0.6698  | 0.6554        | 0.03258 |
| 6        | LG - CTRL:HR&LR            | all genes                     | 1  | 0.683     | 0.3826  | 0.8597        | 0.01536 |
| <b>6</b> | <b>HG - CTRL:HR&amp;LR</b> | all genes                     | 1  | 6.037     | 3.08185 | 0.0081        | 0.15855 |
|          |                            | <i>innate</i>                 | 1  | 4.7112    | 4.9997  | <b>0.0023</b> | 0.23481 |
|          |                            | <i>adaptive</i>               | 1  | 0.9015    | 3.9718  | 0.0176        | 0.19101 |
|          |                            | <i>complement</i>             | 1  | 0.4241    | 0.53716 | 0.5240        | 0.03191 |
|          |                            | <i>Th1</i>                    | 1  | 0.27172   | 6.3830  | 0.0281        | 0.28856 |
|          |                            | <i>Th2</i>                    | 1  | 0.21162   | 1.41429 | 0.2842        | 0.08102 |
|          |                            | <i>Treg</i> (P effect)        | 1  | 0.2842    | 11.4826 | 0.0003        | 0.32809 |
|          |                            | <i>Treg</i> (H effect)        | 1  | 0.09366   | 4.3531  | 0.0222        | 0.12438 |
|          |                            | <i>Treg</i> (P:H interaction) | 1  | 0.09119   | 4.2384  | 0.0240        | 0.12110 |
| 6        | HG - CTRL:LR               | <i>Treg</i>                   | 1  | 0.035747  | 1.11233 | 0.3463        | 0.13857 |
| <b>6</b> | <b>HG - CTRL:HR</b>        | <b><i>Treg</i></b>            | 1  | 0.28071   | 20.1432 | <b>0.0105</b> | 0.72529 |
| 6        | HG - LG:HR&LR              | all genes                     | 1  | 0.857     | 0.45844 | 0.79982       | 0.02550 |
| 9        | LG - CTRL:HR&LR            | all genes (P effect)          | 1  | 1.979     | 1.4393  | 0.05411       | 0.06145 |
|          |                            | all genes (H effect)          | 1  | 5.580     | 4.0580  | 0.01128       | 0.17326 |
| 9        | LG - CTRL:LR               | all genes                     | 1  | 2.6294    | 1.7392  | 0.07292       | 0.18035 |
| 9        | LG - CTRL:HR               | all genes                     | 1  | 1.8375    | 1.5914  | 0.2361        | 0.15425 |
| 9        | HG - CTRL:HR&LR            | all genes                     | 1  | 16.972    | 5.8497  | 0.00340       | 0.27223 |
|          |                            | <i>innate</i>                 | 1  | 2.9039    | 2.16177 | 0.07469       | 0.11711 |
|          |                            | <i>adaptive</i>               | 1  | 0.7096    | 3.4025  | 0.13248       | 0.0393  |
|          |                            | <b><i>complement</i></b>      | 1  | 13.358    | 9.8992  | <b>0.0082</b> | 0.41497 |
|          |                            | <i>Th1</i>                    | 1  | 0.14091   | 1.90958 | 0.1356        | 0.11422 |
|          |                            | <i>Th2</i>                    | 1  | 0.17302   | 1.9625  | 0.1893        | 0.06081 |
|          |                            | <i>Treg</i>                   | 1  | 0.10111   | 2.99380 | 0.07879       | 0.15223 |
| 9        | HG - LG:HR&LR              | all genes                     | 1  | 11.363    | 3.4461  | 0.07465       | 0.21681 |

The statistical models were based on log10-transformed calibrated normalized relative quantities (CNRQ values). The weight of the fish was included as covariate to account for size related effects. Non-parametric permutational multivariate analyses of variance (PERMANOVA) were calculated on Euclidean distances and 10,000 permutations that were constrained within fish family. PERMANOVA results were FDR corrected. If significant (marked in bold letters), single genes were analyzed with linear mixed models (LMMs). Statistics for differences between host types or interactions are mentioned whenever significant. T: time point (week 3, 6, or 9); P: parasite type (low growth, LG; high growth, HG); H: host type (low resistance, LR; high resistance, HR); *all genes*: data from all 23 genes; *innate*: 11 genes (*cd97*, *csf3r*, *il-1 $\beta$* , *marco*, *mif1*, *mst1ra*, *nkef- $\beta$* , *p22<sup>phox</sup>*, *saal1*, *sla1*, *tnfr1*); *adaptive*: nine genes (*stat4*, *cd83*, *igm*, *stat6*, *foxp3*, *il-16*, *tgf- $\beta$* , *mhcll*, *tcr- $\beta$* ); *complement*: three genes (*cfb*, *c7*, *c9*); *Th1*: two genes (*stat4*, *tnfr1*), *Th2* covers three genes (*stat6*, *cd83*, *igm*); *Treg* covers three genes (*il-16*, *foxp3*, *tgf- $\beta$* ).

**Table S13. Differential innate immune gene expression between HG-S. *solidus* infected and control (HR and LR) stickleback in week 6**

| ANOVA results                  | numDF | denDF | F-value   | p-value | pseudo R2  |
|--------------------------------|-------|-------|-----------|---------|------------|
| <i>marco</i>                   | 1     | 9     | 0.193756  | 0.6702  | 0.4923706  |
| <i>mst1ra</i>                  | 1     | 9     | 1.88193   | 0.2033  | 0.9672328  |
| <i>mif1</i>                    | 1     | 9     | 3.305022  | 0.1024  | 0.4501657  |
| <i>il-1<math>\beta</math></i>  | 1     | 9     | 0.400218  | 0.5427  | 0.4503203  |
| <i>tnfr1</i>                   | 1     | 9     | 6.234099  | 0.0340  | 1          |
| <i>saal1</i>                   | 1     | 9     | 6.068530  | 0.0360  | 0.5988541  |
| <i>csf3r</i>                   | 1     | 9     | 2.0903358 | 0.1821  | 0.427818   |
| <i>p22<sup>phox</sup></i>      | 1     | 9     | 1.250352  | 0.2924  | 0.512474   |
| <i>nkef-<math>\beta</math></i> | 1     | 9     | 0.0634747 | 0.8067  | 0.09538045 |
| <i>sla1</i>                    | 1     | 9     | 1.2502136 | 0.2925  | 0.4952347  |
| <i>cd97</i>                    | 1     | 9     | 0.347441  | 0.5701  | 0.3215247  |

The statistical models were based on log10-transformed calibrated normalized relative quantities (CNRQ values). The weight of the fish was included as covariate to account for size related effects. Data from genes from significantly differentially expressed functional gene groups was analyzed with linear mixed models (LMMs; function lme() from *nlme*) and analyses of variance (ANOVAs). Conditional pseudo R<sup>2</sup> values (Nakagawa & Schielzeth, 2013; Johnson, 2014) were calculated with sem.model.fits() from *piecewiseSEM* (Lefcheck, 2015). No gene was significantly differentially expressed after FDR correction..

**Table S14. Differential expression of T regulatory genes between HG-S. *solidus* infected and control HR stickleback in week 6**

| ANOVA results                        | numDF | denDF | F-value   | p-value       | pseudo R2 |
|--------------------------------------|-------|-------|-----------|---------------|-----------|
| <i>il-16</i>                         | 1     | 4     | 2.7784351 | 0.1709        | 0.3274503 |
| <i>foxp3</i>                         | 1     | 4     | 12.615158 | 0.0238        | 0.677801  |
| <b><i>tgf-<math>\beta</math></i></b> | 1     | 4     | 63.60417  | <b>0.0013</b> | 0.8974288 |

The statistical models were based on log10-transformed calibrated normalized relative quantities (CNRQ values). The weight of the fish was included as covariate to account for size related effects. Data from genes from significantly differentially expressed functional gene groups was analyzed with linear mixed models (LMMs; function lme() from *nlme*) and analyses of variance (ANOVAs). Conditional pseudo R<sup>2</sup> values (Nakagawa & Schielzeth, 2013; Johnson, 2014) were calculated with sem.model.fits() from *piecewiseSEM* (Lefcheck, 2015). Differentially expressed genes are marked in bold letters if significant after FDR correction.

**Table S15. Differential expression of complement genes between HG-S. *solidus* infected and control (HR and LR) stickleback in week 9**

| ANOVA results     | numDF | denDF | F-value   | p-value       | pseudo R2 |
|-------------------|-------|-------|-----------|---------------|-----------|
| <b><i>cfb</i></b> | 1     | 10    | 10.051180 | <b>0.0100</b> | 0.7509158 |
| <i>c7</i>         | 1     | 10    | 0.000858  | 0.9772        | 0.1542638 |
| <i>c9</i>         | 1     | 10    | 5.861681  | 0.0360        | 0.9810338 |

The statistical models were based on log10-transformed calibrated normalized relative quantities (CNRQ values). The weight of the fish was included as covariate to account for size related effects. Data from genes from significantly differentially expressed functional gene groups was analyzed with linear mixed models (LMMs; function lme() from *nlme*) and analyses of variance (ANOVAs). Conditional pseudo R<sup>2</sup> values (Nakagawa & Schielzeth, 2013; Johnson, 2014) were calculated with sem.model.fits() from *piecewiseSEM* (Lefcheck, 2015). Differentially expressed genes are marked in bold letters if significant after FDR correction.

**Table S16. Differential immune gene expression between *D. pseudospathaceum* infected and control stickleback**

| contrast       |                             | Df | SumsOfSqs | F.Model | Pr(<F)  | R2      |
|----------------|-----------------------------|----|-----------|---------|---------|---------|
| CTRL - D:LR&HR | all genes (D effect)        | 1  | 3.913     | 1.53871 | 0.12119 | 0.02230 |
|                | all genes (H:T interaction) | 2  | 11.820    | 2.32405 | 0.01040 | 0.06737 |

The statistical models were based on log10-transformed calibrated normalized relative quantities (CNRQ values). Non-parametric permutational multivariate analyses of variance (PERMANOVA) were calculated on Euclidean distances and 10,000 permutations that were constrained within fish family. The weight of the fish was included as covariate to account for size related effects. D effect: effect of *D. pseudospathaceum* infection. In this case, gene expression was only affected by an interaction between host type and time.

**Table S17. Multivariate statistics (PERMANOVA results) of the effect of *S. solidus* – *D. pseudospathaceum* co-infection on stickleback immune gene expression**

| T | P:H                 |                      | Df | SumsOfSqs | F.Model | Pr(<F)        | R2      |
|---|---------------------|----------------------|----|-----------|---------|---------------|---------|
| 3 | Co-LG - CTRL:LR&HR  | all genes            | 1  | 3.830     | 1.39407 | 0.2198        | 0.05774 |
| 3 | Co-HG - CTRL:LR&HR  | all genes            | 1  | 6.807     | 1.88755 | 0.1499        | 0.07230 |
| 3 | Co-HG – Co-LG:LR&HR | all genes            | 1  | 4.138     | 1.22793 | 0.5500        | 0.04170 |
| 6 | Co-LG - CTRL:LR&HR  | all genes            | 1  | 4.754     | 1.82810 | 0.1263        | 0.06671 |
| 6 | Co-HG - CTRL:LR&HR  | all genes            | 1  | 5.814     | 2.43653 | 0.05399       | 0.09334 |
| 6 | Co-HG – Co-LG:LR&HR | all genes            | 1  | 3.696     | 1.3185  | 0.2642        | 0.04603 |
| 9 | Co-LG - CTRL:LR&HR  | all genes            | 1  | 4.926     | 2.02926 | 0.05299       | 0.08354 |
| 9 | Co-HG - CTRL:LR&HR  | all genes (P effect) | 1  | 3.169     | 1.5420  | 0.1608        | 0.04346 |
|   |                     | all genes (H effect) | 1  | 10.510    | 5.1148  | 0.0216        | 0.14414 |
| 9 | Co-HG – CTRL:HR     | all genes            | 1  | 1.348     | 0.6052  | 0.6902        | 0.04097 |
| 9 | Co-HG – CTRL:LR     | all genes            | 1  | 6.6020    | 3.8846  | 0.0178        | 0.22315 |
|   |                     | <i>innate</i>        | 1  | 5.1340    | 5.4308  | <b>0.0195</b> | 0.28195 |
|   |                     | <i>adaptive</i>      | 1  | 1.1485    | 5.2576  | <b>0.0122</b> | 0.25374 |
|   |                     | <i>complement</i>    | 1  | 0.3195    | 0.59627 | 0.4433        | 0.04664 |
|   |                     | <i>Th1</i>           | 1  | 0.40863   | 4.8038  | <b>0.0232</b> | 0.26610 |
|   |                     | <i>Th2</i>           | 1  | 0.42719   | 4.9585  | <b>0.0226</b> | 0.23610 |
|   |                     | <i>Treg</i>          | 1  | 0.59940   | 11.6801 | <b>0.0074</b> | 0.47104 |
| 9 | Co-HG – Co-LG:LR&HR | all genes            | 1  | 1.210     | 0.4679  | 0.7198        | 0.01348 |

The statistical models were based on log10-transformed calibrated normalized relative quantities (CNRQ values). The weight of the fish was included as covariate to account for size related effects. Non-parametric permutational multivariate analyses of variance (PERMANOVA) were calculated on Euclidean distances and 10,000 permutations that were constrained within fish family. PERMANOVA results were FDR corrected. If significant (marked in bold letters), single genes were analyzed with linear mixed models (LMMs). Statistics for differences between host types or interactions are mentioned whenever significant.

**Table S18. Differential immune gene expression between HG-*S. solidus* - *D. pseudospathaceum* co-infected and control LR stickleback in week 9**

| ANOVA results             | numDF | denDF | F-value   | p-value            | pseudo R <sup>2</sup> |
|---------------------------|-------|-------|-----------|--------------------|-----------------------|
| <i>marco</i>              | 1     | 10    | 5.880190  | 0.0358             | 0.3029049             |
| <i>mst1ra</i>             | 1     | 10    | 1.0458040 | 0.3306             | 0.7409858             |
| <i>mif1</i>               | 1     | 10    | 8.678699  | 0.0146             | 0.6739742             |
| <b><i>il-1β</i></b>       | 1     | 10    | 2793093.4 | <b>&lt; 0.0001</b> | 0.9999997             |
| <i>tnfr1</i>              | 1     | 10    | 5.668682  | 0.0386             | 0.5735934             |
| <i>saal1</i>              | 1     | 10    | 1.5908441 | 0.2358             | 0.1020698             |
| <i>csf3r</i>              | 1     | 10    | 4.343719  | 0.0638             | 0.2487352             |
| <i>p22<sup>phox</sup></i> | 1     | 10    | 4.312283  | 0.0646             | 0.4603152             |
| <i>nkef-β</i>             | 1     | 10    | 7.287676  | 0.0223             | 0.2660523             |
| <i>sla1</i>               | 1     | 10    | 5.184409  | 0.0460             | 0.2948069             |
| <i>cd97</i>               | 1     | 10    | 5.056703  | 0.0483             | 0.286804              |
| <i>stat4</i>              | 1     | 10    | 1.985945  | 0.1891             | 0.4252173             |
| <i>stat6</i>              | 1     | 10    | 7.755325  | 0.0193             | 0.4208772             |
| <i>igm</i>                | 1     | 10    | 5.580071  | 0.0398             | 0.7597721             |
| <i>cd83</i>               | 1     | 10    | 0.1557763 | 0.7014             | 0.0529079             |
| <b><i>foxp3</i></b>       | 1     | 10    | 17.383392 | <b>0.0019</b>      | 0.7420727             |
| <b><i>tgf-β</i></b>       | 1     | 10    | 10.890636 | <b>0.0080</b>      | 0.4390618             |
| <b><i>il-16</i></b>       | 1     | 10    | 10.284613 | <b>0.0094</b>      | 0.4926989             |
| <i>mhcll</i>              | 1     | 10    | 0.457965  | 0.5139             | 0.5255997             |
| <i>tcr-β</i>              | 1     | 10    | 0.233701  | 0.6392             | 0.5590239             |

The statistical models were based on log<sub>10</sub>-transformed calibrated normalized relative quantities (CNRQ values). The weight of the fish was included as covariate to account for size related effects. Data from genes from significantly differentially expressed functional gene groups was analyzed with linear mixed models (LMMs; function lme() from nlme) and analyses of variance (ANOVAs). Conditional pseudo R<sup>2</sup> values (Nakagawa & Schielzeth, 2013; Johnson, 2014) were calculated with sem.model.fits() from piecewiseSEM (Lefcheck, 2015). Differentially expressed genes are marked in bold letters if significant after FDR correction.

**Table S19. Differential immune gene expression between *S. solidus* infected and co-infected stickleback contrast**

| T | P:H              |                              | Df | SumsOfSqs | F.Model | Pr(<F)   | R2      |
|---|------------------|------------------------------|----|-----------|---------|----------|---------|
| 3 | Co-LG - LG:LR&HR | all genes                    | 1  | 1.979     | 0.96971 | 0.4699   | 0.04058 |
| 3 | Co-HG - HG:LR&HR | all genes                    | 1  | 2.275     | 0.63169 | 0.5374   | 0.02671 |
| 6 | Co-LG - LG:LR&HR | all genes                    | 1  | 3.354     | 1.3296  | 0.1487   | 0.04992 |
| 6 | Co-HG - HG:LR&HR | all genes                    | 1  | 3.566     | 1.37490 | 0.2674   | 0.07615 |
| 9 | Co-LG -LG:LR&HR  | all genes                    | 1  | 1.156     | 0.46060 | 0.75532  | 0.02303 |
| 9 | Co-HG -HG:LR&HR  | all genes                    | 1  | 18.471    | 6.4611  | 0.005899 | 0.18743 |
|   |                  | <i>innate</i>                | 1  | 0.433     | 0.4466  | 0.60324  | 0.01343 |
|   |                  | <i>adaptive</i>              | 1  | 0.1859    | 0.6555  | 0.56034  | 0.02125 |
|   |                  | <i>complement</i>            | 1  | 17.852    | 11.1198 | 0.005799 | 0.31020 |
|   |                  | <i>Th1</i> (P effect)        | 1  | 0.02807   | 0.7082  | 0.4527   | 0.02336 |
|   |                  | <i>Th1</i> (H effect)        | 1  | 0.02855   | 0.7205  | 0.0268   | 0.02377 |
|   |                  | <i>Th2</i> (P:H interaction) | 1  | 0.5031    | 3.2453  | 0.0208   | 0.10287 |
|   |                  | <i>Treg</i>                  | 1  | 0.05298   | 1.3689  | 0.26737  | 0.03918 |
| 9 | Co-HG -HG:LR     | <i>Th1</i>                   | 1  | 0.03520   | 0.6851  | 0.45035  | 0.03320 |
|   |                  | <i>Th2</i>                   | 1  | 0.27530   | 3.5893  | 0.06289  | 0.13303 |
| 9 | Co-HG -HG:HR     | <i>Th1</i>                   | 1  | 0.034140  | 3.3354  | 0.07979  | 0.26900 |
|   |                  | <i>Th2</i>                   | 1  | 0.24033   | 1.27777 | 0.1914   | 0.11415 |

The statistical models were based on log<sub>10</sub>-transformed calibrated normalized relative quantities (CNRQ values). The weight of the fish was included as covariate to account for size related effects. Non-parametric permutational multivariate analyses of variance (PERMANOVA) were calculated on Euclidean distances and 10,000 permutations that were constrained within fish family. Statistics for differences between host types or interactions are mentioned whenever significant. PERMANOVA results were FDR corrected. In this case, no result remained significant after FDR correction.

**Table S20. Differential immune gene expression between *D. pseudospathaceum* infected and co-infected stickleback**

| contrast |                 |                      | T | P:H | Df | SumsOfSqs | F.Model | Pr(<F)  | R2      |
|----------|-----------------|----------------------|---|-----|----|-----------|---------|---------|---------|
| 3        | Co-LG - D:LR&HR | all genes            | 1 |     | 1  | 1.448     | 0.61862 | 0.6900  | 0.02419 |
| 3        | Co-HG - D:LR&HR | all genes            | 1 |     | 1  | 4.478     | 1.32821 | 0.2193  | 0.05041 |
| 6        | Co-LG - D:LR&HR | all genes            | 1 |     | 1  | 2.580     | 0.79285 | 0.65243 | 0.03015 |
| 6        | Co-HG - D:LR&HR | all genes            | 1 |     | 1  | 6.998     | 2.29249 | 0.06219 | 0.08835 |
| 9        | Co-LG -D:LR&HR  | all genes            | 1 |     | 1  | 2.249     | 0.79498 | 0.4033  | 0.03304 |
| 9        | Co-HG -D:LR&HR  | all genes (P effect) | 1 |     | 1  | 2.052     | 0.8567  | 0.56224 | 0.02515 |
| 9        | Co-HG -D:LR&HR  | all genes (H effect) | 1 |     | 1  | 9.948     | 4.1524  | 0.04440 | 0.12191 |
| 9        | Co-HG -D:LR     | all genes            | 1 |     | 1  | 4.893     | 2.4794  | 0.03130 | 0.14528 |
|          |                 | <i>innate</i>        | 1 |     | 1  | 1.4688    | 1.4344  | 0.1450  | 0.08567 |
|          |                 | <i>adaptive</i>      | 1 |     | 1  | 1.8106    | 8.7102  | 0.03170 | 0.35095 |
|          |                 | <i>complement</i>    | 1 |     | 1  | 1.6133    | 2.17597 | 0.06329 | 0.14185 |
|          |                 | <i>Th1</i>           | 1 |     | 1  | 0.71763   | 12.6316 | 0.0354  | 0.47246 |
|          |                 | <i>Th2</i>           | 1 |     | 1  | 0.91437   | 8.8065  | 0.0478  | 0.37766 |
|          |                 | <i>Treg</i>          | 1 |     | 1  | 0.54614   | 11.2381 | 0.0329  | 0.43678 |
| 9        | Co-HG -D:HR     | all genes            |   |     |    | 2.940     | 1.00147 | 0.4807  | 0.07760 |

The statistical models were based on log10-transformed calibrated normalized relative quantities (CNRQ values). The weight of the fish was included as covariate to account for size related effects. Non-parametric permutational multivariate analyses of variance (PERMANOVA) were calculated on Euclidean distances and 10,000 permutations that were constrained within fish family. Statistics for differences between host types are mentioned when significant and infection effects were then tested for HR and LR host types separately. PERMANOVA results were FDR corrected. In this case, no results remained significant after FDR correction. D: *Diplostomum pseudospathaceum* infection.



## References

- Aerts-Toegaert, C., Heirman, C., Tuybaerts, S., Corthals, J., Aerts, J. L., Bonehill, A., ... Breckpot, K. (2007). CD83 expression on dendritic cells and T cells: Correlation with effective immune responses. *European Journal of Immunology*, 37(3), 686–695. doi:10.1002/eji.200636535
- Bedard, K., & Krause, K.-H. (2007). The NOX Family of ROS-Generating NADPH Oxidases: Physiology and Pathophysiology. *Physiological Reviews*, 87(1), 245–313. doi:10.1152/physrev.00044.2005
- Birrer, S. C., Reusch, T. B. H., & Roth, O. (2012). Salinity change impairs pipefish immune defence. *Fish and Shellfish Immunology*, 33(6), 1238–1248. doi:10.1016/j.fsi.2012.08.028
- Brunner, F. S. (2016). *Parasitism along the speciation continuum - Variation of parasite effects across speciation stages of Gasterosteus aculeatus and their modification by environmental changes*. University of London. Retrieved from <https://www.dora.lib4ri.ch/eawag/islandora/object/eawag:13601>
- Brunner, F. S., Anaya-Rojas, J. M., Matthews, B., & Eizaguirre, C. (2017). *Experimental evidence that parasites drive eco-evolutionary feedbacks*. *Proceedings of the National Academy of Sciences* (Vol. 114). doi:10.1073/pnas.1619147114
- Calandra, T., & Roger, T. (2003). Macrophage migration inhibitory factor: a regulator of innate immunity. *Nature Reviews Immunology*, 3(10), 791–800. doi:10.1038/nri1200
- Haarder, S., Kania, P. W., Bahloul, Q. Z. M., & Buchmann, K. (2013). Expression of immune relevant genes in rainbow trout following exposure to live *Anisakis simplex* larvae. *Experimental Parasitology*, 135(3), 564–569. doi:10.1016/j.exppara.2013.09.011
- Haase, D., Rieger, J. K., Witten, A., Stoll, M., Bornberg-Bauer, E., Kalbe, M., & Reusch, T. B. H. (2014). Specific Gene Expression Responses to Parasite Genotypes Reveal Redundancy of Innate Immunity in Vertebrates. *PLoS ONE*, 9(9), e108001. doi:10.1371/journal.pone.0108001
- Hibbeler, S., Scharsack, J. P., & Becker, S. (2008). Housekeeping genes for quantitative expression studies in the three-spined stickleback *Gasterosteus aculeatus*. *BMC Molecular Biology*, 9(1), 18. doi:10.1186/1471-2199-9-18
- Huang, Y., Chain, F. J. J., Panchal, M., Eizaguirre, C., Kalbe, M., Lenz, T. L., ... Feulner, P. G. D. (2016). Transcriptome profiling of immune tissues reveals habitat-specific gene expression between lake and river sticklebacks. *Molecular Ecology*, 25(4), 943–958. doi:10.1111/mec.13520
- Johnson, P. C. D. (2014). Extension of Nakagawa & Schielzeth's R2GLMM to random slopes models. *Methods in Ecology and Evolution*, 5(9), 944–946. doi:10.1111/2041-210X.12225
- Kaplan, M. H. (2005). STAT4: A critical regulator of inflammation in vivo. *Immunologic Research*, 31(3), 231–241. doi:10.1385/IR:31:3:231
- Kasheta, M., Painter, C. A., Moore, F. E., Lobbardi, R., Bryll, A., Freiman, E., ... Ceol, C. J. (2017). Identification and characterization of T reg-like cells in zebrafish. *The Journal of Experimental Medicine*, 214(12), 3519–3530. doi:10.1084/jem.20162084
- Kissick, H. T., Dunn, L. K., Ghosh, S., Nechama, M., Kobzik, L., & Arredouani, M. S. (2014). The scavenger receptor MARCO modulates TLR-induced responses in dendritic cells. *PLoS ONE*, 9(8), 1–11. doi:10.1371/journal.pone.0104148
- Kovacevic, N., Hagen, M. O., Xie, J., & Belosevic, M. (2015). The analysis of the acute phase response during the course of *Trypanosoma carassii* infection in the goldfish (*Carassius auratus* L.). *Developmental and Comparative Immunology*, 53(1), 112–122. doi:10.1016/j.dci.2015.06.009
- Kraal, G., Van Der Laan, L. J. W., Elomaa, O., & Tryggvason, K. (2000). The macrophage receptor MARCO. *Microbes and Infection*, 2(3), 313–316. doi:10.1016/S1286-4579(00)00296-3
- Leemans, J. C., te Velde, A. A., Florquin, S., Bennink, R. J., de Bruin, K., van Lier, R. A. W., ... Hamann, J. (2004). The Epidermal Growth Factor-Seven Transmembrane (EGF-TM7) Receptor CD97 Is Required for Neutrophil Migration and Host Defense. *The Journal of Immunology*, 172(2), 1125–1131. doi:10.4049/jimmunol.172.2.1125
- Lefcheck, J. S. (2015). piecewiseSEM: Piecewise structural equation modeling in R for ecology, evolution, and systematics. *Methods in Ecology and Evolution*, 7(5), 573–579. doi:10.1111/2041-210X.12512
- Lenz, T. L., Eizaguirre, C., Becker, S., & Reusch, T. B. H. (2009). RSCA genotyping of MHC for high-throughput evolutionary studies in the model organism three-spined stickleback *Gasterosteus aculeatus*. *BMC Evolutionary Biology*, 9, 57. doi:10.1186/1471-2148-9-57

- Marton, N., Baricza, E., Érsek, B., Buzás, E. I., & Nagy, G. (2015). The emerging and diverse roles of Src-like adaptor proteins in health and disease. *Mediators of Inflammation*, 2015. doi:10.1155/2015/952536
- Maxson, J. E., Gotlib, J., Pollyea, D. A., Fleischman, A. G., Agarwal, A., Eide, C. A., ... Tyner, J. W. (2013). Oncogenic CSF3R Mutations in Chronic Neutrophilic Leukemia and Atypical CML. *New England Journal of Medicine*, 368(19), 1781–1790. doi:10.1056/NEJMoa1214514
- Mayumi, M., Takeda, Y., Hoshiko, M., Serada, K., Murata, M., Moritomo, T., ... Sumimoto, H. (2008). Characterization of teleost phagocyte NADPH oxidase: Molecular cloning and expression analysis of carp (*Cyprinus carpio*) phagocyte NADPH oxidase. *Molecular Immunology*, 45(6), 1720–1731. doi:10.1016/j.molimm.2007.09.028
- Nakagawa, S., & Schielzeth, H. (2013). A general and simple method for obtaining R2 from generalized linear mixed-effects models. *Methods in Ecology and Evolution*, 4(2), 133–142. doi:10.1111/j.2041-210x.2012.00261.x
- Premachandra, H. K. A., Elvitigala, D. A. S., Bathige, S. D. N. K., Whang, I., Lee, Y., De Zoysa, M., & Lee, J. (2013). Genomic structure and immunological response of an STAT4 family member from rock bream (*Oplegnathus fasciatus*). *Fish and Shellfish Immunology*, 35(6), 1829–1837. doi:10.1016/j.fsi.2013.09.011
- Rao, D. N., & Naqvi, R. A. (2011). FoxP3: A key player in T regulatory biology. *Indian Journal of Clinical Biochemistry*, 26(1), 1–2. doi:10.1007/s12291-011-0112-8
- Rhodes, L. D., Wallis, S., & Demlow, S. E. (2009). Genes associated with an effective host response by Chinook salmon to *Renibacterium salmoninarum*. *Developmental and Comparative Immunology*, 33(2), 176–186. doi:10.1016/j.dci.2008.08.006
- Robertson, S., Bradley, J. E., & MacColl, A. D. C. (2015). Measuring the immune system of the three-spined stickleback - investigating natural variation by quantifying immune expression in the laboratory and the wild. *Molecular Ecology Resources*, 16(3), 701–713. doi:10.1111/1755-0998.12497
- Rønneseth, A., Ghebretsaie, D. B., Wergeland, H. I., & Haugland, G. T. (2015). Functional characterization of IgM<sup>+</sup> B cells and adaptive immunity in lumpfish (*Cyclopterus lumpus* L.). *Developmental and Comparative Immunology*, 52(2), 132–143. doi:10.1016/j.dci.2015.05.010
- Shau, H., Gupta, R. K., & Golub, S. H. (1993). Identification of a natural killer enhancing factor (NKEF) from human erythroid cells. *Cellular Immunology*. doi:10.1006/cimm.1993.1043
- Smith-Garvin, J. E., Koretzky, G. A., & Jordan, M. S. (2009). T Cell Activation. *Annual Review of Immunology*, 27(1), 591–619. doi:10.1146/annurev.immunol.021908.132706
- Stutz, W. E., Schmerer, M., Coates, J. L., & Bolnick, D. I. (2015). Among-lake reciprocal transplants induce convergent expression of immune genes in threespine stickleback. *Molecular Ecology*, 24(18), 4629–4646. doi:10.1111/mec.13295
- Tabbara, I. A. (1993). Granulocyte colony-stimulating factor. *Southern Medical Journal*, 86(3), 350–5. Retrieved from <http://www.ncbi.nlm.nih.gov/pubmed/7680827>
- Wang, M. H., Zhou, Y. Q., & Chen, Y. Q. (2002). Macrophage-stimulating protein and RON receptor tyrosine kinase: Potential regulators of macrophage inflammatory activities. *Scandinavian Journal of Immunology*, 56(6), 545–553. doi:10.1046/j.1365-3083.2002.01177.x
- Wang, T., & Secombes, C. J. (2013). The cytokine networks of adaptive immunity in fish. *Fish and Shellfish Immunology*, 35(6), 1703–1718. doi:10.1016/j.fsi.2013.08.030
- Wen, Y., Shao, J. Z., Xiang, L. X., & Fang, W. (2006). Cloning, characterization and expression analysis of two *Tetraodon nigroviridis* interleukin-16 isoform genes. *Comparative Biochemistry and Physiology - B Biochemistry and Molecular Biology*, 144(2), 159–166. doi:10.1016/j.cbpb.2006.02.012
- Yanagi, Y., Yoshikai, Y., Leggett, K., Clark, S. P., Aleksander, I., & Mak, T. W. (1984). A human T cell-specific cDNA clone encodes a protein having extensive homology to immunoglobulin chains. *Nature*, 308(5955), 145–9. doi:10.1038/308145a0
- Zhu, L., Nie, L., Zhu, G., Xiang, L., & Shao, J. (2013). Advances in research of fish immune-relevant genes: a comparative overview of innate and adaptive immunity in teleosts. *Developmental and Comparative Immunology*, 39(1–2), 39–62. doi:10.1016/j.dci.2012.04.001
